# Supplementary material for: Summary of high field diffusion MRI and microscopy data demonstrate microstructural aberration in chronic mild stress rat brain
Source: PubMed Central journal article supplement (PMC4961219; doi:10.1016/j.dib.2016.06.061), 2016-07-05
Supplement: mmc1.pdf [file mmc1.pdf]

## **Conflicts of Interest Statement**

The author(s) declared no potential conflicts of interest with respect to the research, authorship, and/or publication of this article.

**Manuscript title:** Summary of high field diffusion MRI and microscopy data demonstrate microstructural aberration in chronic mild stress rat brain

---

The authors whose names are listed immediately below certify that they have NO affiliations with or involvement in any organization or entity with any financial interest (such as honoraria; educational grants; participation in speakers' bureaus; membership, employment, consultancies, stock ownership, or other equity interest; and expert testimony or patent-licensing arrangements), or non-financial interest (such as personal or professional relationships, affiliations, knowledge or beliefs) in the subject matter or materials discussed in this manuscript.

**Author names:**

Ahmad Raza Khan, Andrey Chuhutin, Ove Wiborg, Christopher D Kroenke, Jens R. Nyengaard, Brian Hansen and Sune Nørhøj Jespersen

The authors whose names are listed immediately below report the following details of affiliation or involvement in an organization or entity with a financial or non-financial interest in the subject matter or materials discussed in this manuscript. Please specify the nature of the conflict on a separate sheet of paper if the space below is inadequate.

**Author names:**

Ahmad Raza Khan, Andrey Chuhutin, Ove Wiborg, Christopher D Kroenke, Jens R. Nyengaard, Brian Hansen and Sune Nørhøj Jespersen

This statement is signed by all the authors to indicate agreement that the above information is true and correct (a photocopy of this form may be used if there are more than 10 authors):

Author's name (typed)

Author's signature

Date

Ahmad Raza Khan



21.04.16

Andrey Chuhutin

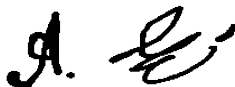

21.04.16

Ove Wiborg

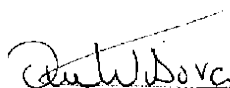

21.04.16

Christopher D Kroenke



4/20/16

Jens R. Nyengaard

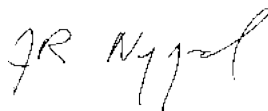

21.04.16

Brian Hansen



21.04.16

Sune Nørhøj Jespersen

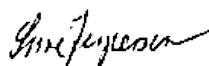

21.04.16

\_\_\_\_\_

\_\_\_\_\_

\_\_\_\_\_

\_\_\_\_\_

\_\_\_\_\_

\_\_\_\_\_

\_\_\_\_\_

\_\_\_\_\_

\_\_\_\_\_
